# Supplementary material for: Growth, physicochemical and quantum chemical investigations on 2-amino 5-chloropyridinium 4-carboxybutanoate – an organic crystal for biological and optoelectronic device applications
Source: Royal Society of Chemistry journal article supplement (doi:10.1039/c6ra15791b), 2016-01-01
Supplement: c6ra15791b1.pdf [file c6ra15791b1.pdf]

## Supplementary Information

### Growth, physicochemical and quantum chemical investigations on 2-amino 5-chloropyridinium 4-carboxybutanoate – An organic crystal for biological and optoelectronic device applications

B. Babu<sup>a</sup>, J. Chandrasekaran<sup>a,\*</sup>, B. Mohanbabu<sup>a</sup>, Yoshitaka Matsushita<sup>b</sup>, M. Saravanakumar<sup>c</sup>

<sup>a</sup> Department of Physics, Sri Ramakrishna Mission Vidyalaya College of Arts and Science, Coimbatore – 641 020, Tamil Nadu, India.

<sup>b</sup> Materials Analysis Station, National Institute for Materials Science, 1-1 Namiki, Tsukuba, Ibaraki 305-0044, Japan.

<sup>c</sup> Department of Physics, Bishop Moore College, Mavelikara, 690110 Kerala, India.

\*Corresponding author: Ph: +91-422-2692461, Fax: +91-422-2692676  
E-mail address: jchandaravind@yahoo.com (J. Chandrasekaran)

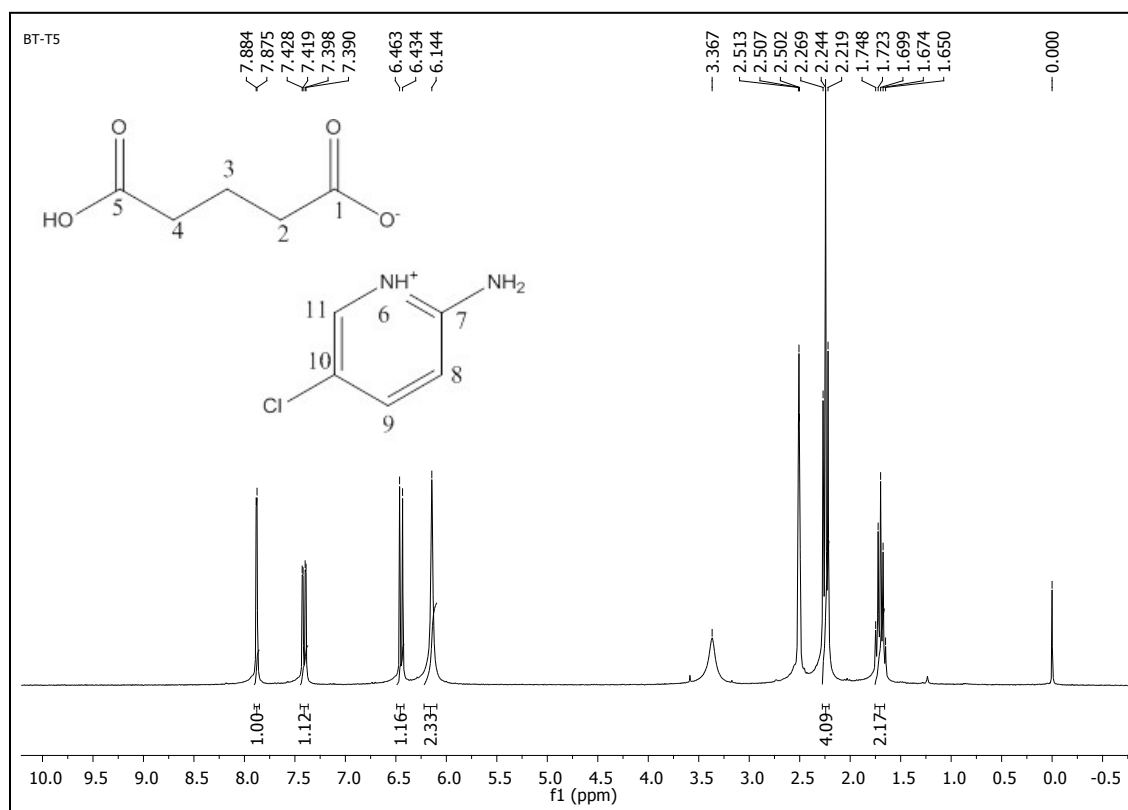

Fig. S1. <sup>1</sup>H NMR spectrum of 2A5C4C.

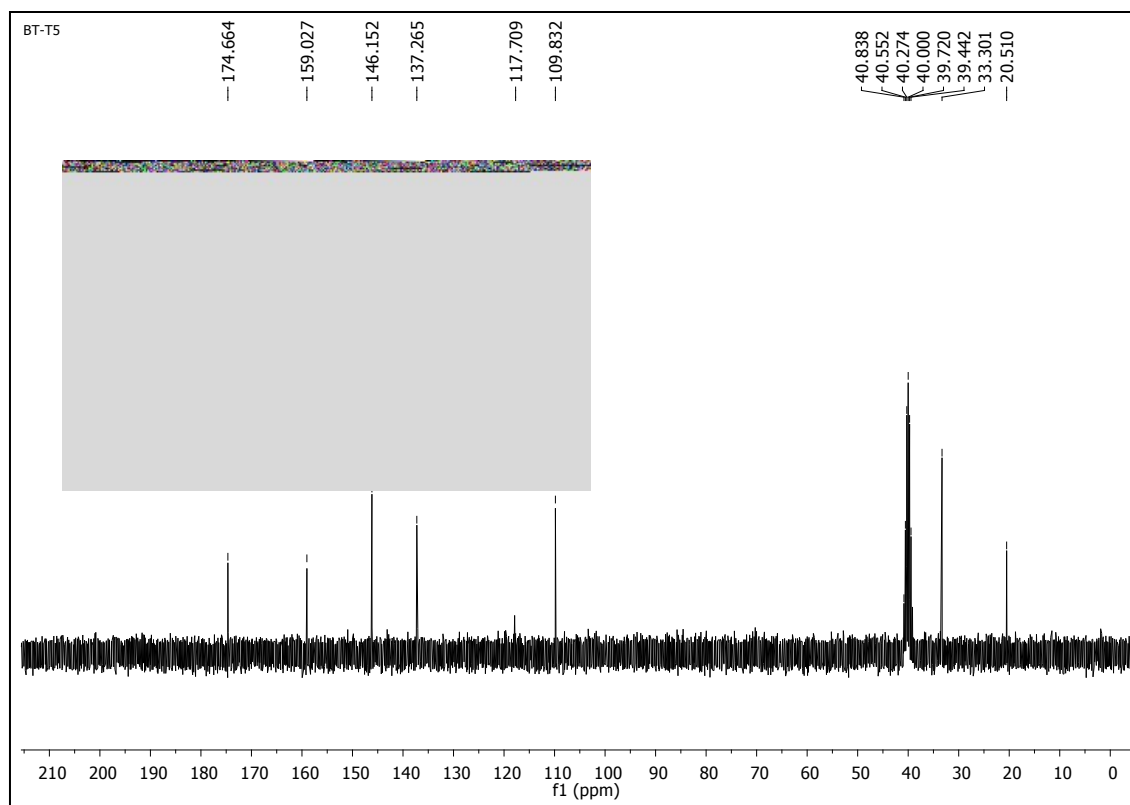

**Fig. S2.**  $^{13}\text{C}$  NMR spectrum of 2A5C4C.

**Table S1**

$^1\text{H}$  and  $^{13}\text{C}$  NMR chemical shift values of 2A5C4C crystal.

| Chemical shift value (ppm)                           | Assignment                                                  |
|------------------------------------------------------|-------------------------------------------------------------|
| <b>The <math>^1\text{H}</math> NMR spectral data</b> |                                                             |
| 7.88-7.87                                            | Aliphatic carboxylic acid proton.                           |
| 7.42-7.39                                            | $\text{C}_{9,11}$ aromatic proton of the pyridinium moiety. |
| 6.46-6.43                                            | $\text{C}_8$ aromatic proton of the pyridinium moiety.      |
| 6.14                                                 | $\text{NH}_2$ proton signal.                                |
| 2.26-2.21                                            | $\text{C}_2, \text{C}_5$ , aliphatic methylene protons.     |
| 1.74-1.65                                            | $\text{C}_3$ aliphatic methylene protons.                   |
| <b><math>^{13}\text{C}</math> NMR spectral data</b>  |                                                             |
| 174.6                                                | Carboxyl carbon of the butanoic acid moiety.                |
| 159.0                                                | $\text{C}_7$ carbon of the pyridinium moiety.               |
| 146.1                                                | $\text{C}_{10}$ carbon of the pyridinium moiety.            |
| 137.2                                                | $\text{C}_9$ carbon of the pyridinium moiety.               |
| 117.7                                                | $\text{C}_{11}$ carbon of the pyridinium moiety.            |
| 109.8                                                | $\text{C}_8$ carbon of the pyridinium moiety.               |
| 33.3                                                 | $\text{C}_2, \text{C}_4$ Methylene carbon of butanoic acid. |
| 20.5                                                 | $\text{C}_3$ Methylene carbon of butanoic acid.             |

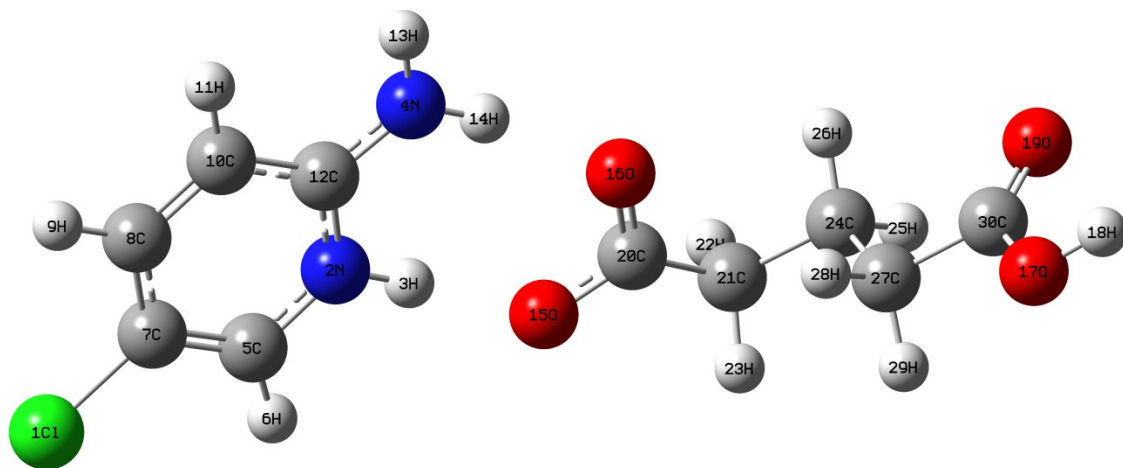

**Fig. S3** Molecular structure of 2A5C4C along with numbering of atoms.

**Table S2:** Optimized geometric parameters of 2A5C4C at B3LYP/6-311++G(d,p) level of theory.

| Bond lengths                     | B3LYP<br>(Å) | XRD<br>(Å) | Bond<br>angles                                    | B3LYP<br>(°) | XRD<br>(°) | Dihedral<br>Angles                                                 | B3LYP<br>(°) | XRD<br>(°) |
|----------------------------------|--------------|------------|---------------------------------------------------|--------------|------------|--------------------------------------------------------------------|--------------|------------|
| Cl <sub>1</sub> -C <sub>7</sub>  | 1.731        | 1.723      | H <sub>3</sub> -N <sub>2</sub> -C <sub>5</sub>    | 117.36       | 118.40     | H <sub>3</sub> -N <sub>2</sub> -C <sub>5</sub> -H <sub>6</sub>     | 0.15         | 1.06       |
| N <sub>2</sub> -H <sub>3</sub>   | 1.025        | 0.860      | H <sub>3</sub> -N <sub>2</sub> -C <sub>12</sub>   | 118.90       | 118.46     | H <sub>3</sub> -N <sub>2</sub> -C <sub>5</sub> -C <sub>7</sub>     | -179.82      | -178.07    |
| N <sub>2</sub> -C <sub>5</sub>   | 1.365        | 1.349      | C <sub>5</sub> -N <sub>2</sub> -C <sub>12</sub>   | 123.74       | 123.13     | C <sub>12</sub> -N <sub>2</sub> -C <sub>5</sub> -H <sub>6</sub>    | -179.99      | -178.93    |
| N <sub>2</sub> -C <sub>12</sub>  | 1.360        | 1.350      | C <sub>12</sub> -N <sub>4</sub> -H <sub>13</sub>  | 119.78       | 119.32     | C <sub>12</sub> -N <sub>2</sub> -C <sub>5</sub> -C <sub>7</sub>    | 0.04         | 1.04       |
| H <sub>3</sub> -O <sub>15</sub>  | 1.924        | 1.800      | C <sub>12</sub> -N <sub>4</sub> -H <sub>14</sub>  | 122.21       | 122.88     | H <sub>3</sub> -N <sub>2</sub> -C <sub>12</sub> -N <sub>4</sub>    | -0.15        | -0.21      |
| N <sub>4</sub> -C <sub>12</sub>  | 1.340        | 1.315      | H <sub>13</sub> -N <sub>4</sub> -H <sub>14</sub>  | 118.01       | 116.99     | H <sub>3</sub> -N <sub>2</sub> -C <sub>12</sub> -C <sub>10</sub>   | 179.79       | 178.25     |
| N <sub>4</sub> -H <sub>13</sub>  | 1.008        | 0.874      | N <sub>2</sub> -C <sub>5</sub> -H <sub>6</sub>    | 116.29       | 119.76     | C <sub>5</sub> -N <sub>2</sub> -C <sub>12</sub> -N <sub>4</sub>    | 180.00       | 179.78     |
| N <sub>4</sub> -H <sub>14</sub>  | 1.014        | 0.894      | N <sub>2</sub> -C <sub>5</sub> -C <sub>7</sub>    | 119.89       | 120.42     | C <sub>5</sub> -N <sub>2</sub> -C <sub>12</sub> -C <sub>10</sub>   | -0.07        | -1.76      |
| C <sub>5</sub> -H <sub>6</sub>   | 1.082        | 0.930      | H <sub>6</sub> -C <sub>5</sub> -C <sub>7</sub>    | 123.82       | 119.82     | H <sub>13</sub> -N <sub>4</sub> -C <sub>12</sub> -N <sub>2</sub>   | -179.95      | -171.01    |
| C <sub>5</sub> -C <sub>7</sub>   | 1.371        | 1.342      | Cl <sub>1</sub> -C <sub>7</sub> -C <sub>5</sub>   | 120.55       | 120.74     | H <sub>13</sub> -N <sub>4</sub> -C <sub>12</sub> -C <sub>10</sub>  | 0.11         | 10.65      |
| C <sub>7</sub> -C <sub>8</sub>   | 1.416        | 1.405      | Cl <sub>1</sub> -C <sub>7</sub> -C <sub>8</sub>   | 120.91       | 120.40     | H <sub>14</sub> -N <sub>4</sub> -C <sub>12</sub> -N <sub>2</sub>   | -0.75        | -1.60      |
| C <sub>8</sub> -H <sub>9</sub>   | 1.085        | 0.930      | C <sub>5</sub> -C <sub>7</sub> -C <sub>8</sub>    | 118.55       | 118.77     | H <sub>14</sub> -N <sub>4</sub> -C <sub>12</sub> -C <sub>10</sub>  | 179.32       | 179.94     |
| C <sub>8</sub> -C <sub>10</sub>  | 1.375        | 1.346      | C <sub>7</sub> -C <sub>8</sub> -H <sub>9</sub>    | 119.36       | 120.01     | N <sub>2</sub> -C <sub>5</sub> -C <sub>7</sub> -Cl <sub>1</sub>    | -179.99      | -179.20    |
| C <sub>10</sub> -H <sub>11</sub> | 1.084        | 0.930      | C <sub>7</sub> -C <sub>8</sub> -C <sub>10</sub>   | 120.51       | 119.99     | N <sub>2</sub> -C <sub>5</sub> -C <sub>7</sub> -C <sub>8</sub>     | 0.02         | 0.59       |
| C <sub>10</sub> -C <sub>12</sub> | 1.417        | 1.403      | H <sub>9</sub> -C <sub>8</sub> -C <sub>10</sub>   | 120.13       | 120.01     | H <sub>6</sub> -C <sub>5</sub> -C <sub>7</sub> -Cl <sub>1</sub>    | 0.04         | 0.77       |
| H <sub>14</sub> -O <sub>16</sub> | 2.065        | 1.920      | C <sub>8</sub> -C <sub>10</sub> -H <sub>11</sub>  | 120.91       | 119.82     | H <sub>6</sub> -C <sub>5</sub> -C <sub>7</sub> -C <sub>8</sub>     | -179.95      | -179.44    |
| O <sub>15</sub> -C <sub>20</sub> | 1.269        | 1.274      | C <sub>8</sub> -C <sub>10</sub> -C <sub>12</sub>  | 120.09       | 120.80     | Cl <sub>1</sub> -C <sub>7</sub> -C <sub>8</sub> -H <sub>9</sub>    | -0.01        | -1.68      |
| O <sub>16</sub> -C <sub>20</sub> | 1.270        | 1.233      | H <sub>11</sub> -C <sub>10</sub> -C <sub>12</sub> | 119.01       | 119.59     | Cl <sub>1</sub> -C <sub>7</sub> -C <sub>8</sub> -C <sub>10</sub>   | 179.96       | 178.38     |
| O <sub>17</sub> -H <sub>18</sub> | 0.973        | 0.810      | N <sub>2</sub> -C <sub>12</sub> -N <sub>4</sub>   | 119.06       | 118.57     | C <sub>5</sub> -C <sub>7</sub> -C <sub>8</sub> -H <sub>9</sub>     | 179.98       | 178.54     |
| O <sub>17</sub> -C <sub>30</sub> | 1.348        | 1.317      | N <sub>2</sub> -C <sub>12</sub> -C <sub>10</sub>  | 117.22       | 116.87     | C <sub>5</sub> -C <sub>7</sub> -C <sub>8</sub> -C <sub>10</sub>    | -0.05        | -1.40      |
| O <sub>19</sub> -C <sub>30</sub> | 1.210        | 1.192      | N <sub>4</sub> -C <sub>12</sub> -C <sub>10</sub>  | 123.71       | 124.54     | C <sub>7</sub> -C <sub>8</sub> -C <sub>10</sub> -H <sub>11</sub>   | -179.97      | -179.34    |
| C <sub>20</sub> -C <sub>21</sub> | 1.489        | 1.512      | H <sub>18</sub> -O <sub>17</sub> -C <sub>30</sub> | 107.03       | 115.76     | C <sub>7</sub> -C <sub>8</sub> -C <sub>10</sub> -C <sub>12</sub>   | 0.02         | 0.65       |
| C <sub>21</sub> -H <sub>22</sub> | 1.099        | 0.969      | O <sub>15</sub> -C <sub>20</sub> -O <sub>16</sub> | 109.02       | 122.66     | H <sub>9</sub> -C <sub>8</sub> -C <sub>10</sub> -H <sub>11</sub>   | 0.01         | 0.72       |
| C <sub>21</sub> -H <sub>23</sub> | 1.096        | 0.970      | O <sub>15</sub> -C <sub>20</sub> -C <sub>21</sub> | 125.53       | 116.57     | H <sub>9</sub> -C <sub>8</sub> -C <sub>10</sub> -C <sub>12</sub>   | 179.99       | 179.20     |
| C <sub>21</sub> -C <sub>24</sub> | 1.538        | 1.516      | O <sub>16</sub> -C <sub>20</sub> -C <sub>21</sub> | 125.43       | 120.76     | C <sub>8</sub> -C <sub>10</sub> -C <sub>12</sub> -N <sub>2</sub>   | 0.04         | 0.80       |
| C <sub>24</sub> -H <sub>25</sub> | 1.093        | 0.971      | C <sub>20</sub> -C <sub>21</sub> -H <sub>22</sub> | 105.57       | 108.50     | C <sub>8</sub> -C <sub>10</sub> -C <sub>12</sub> -N <sub>4</sub>   | 179.97       | 179.25     |
| C <sub>24</sub> -H <sub>26</sub> | 1.094        | 0.970      | C <sub>20</sub> -C <sub>21</sub> -H <sub>23</sub> | 107.50       | 108.50     | H <sub>11</sub> -C <sub>10</sub> -C <sub>12</sub> -N <sub>2</sub>  | -179.97      | -179.13    |
| C <sub>24</sub> -C <sub>27</sub> | 1.530        | 1.504      | C <sub>20</sub> -C <sub>21</sub> -C <sub>24</sub> | 114.07       | 115.19     | H <sub>11</sub> -C <sub>10</sub> -C <sub>12</sub> -N <sub>4</sub>  | -0.04        | -0.77      |
| C <sub>27</sub> -H <sub>28</sub> | 1.097        | 0.971      | H <sub>22</sub> -C <sub>21</sub> -H <sub>23</sub> | 106.09       | 107.51     | H <sub>18</sub> -O <sub>17</sub> -C <sub>30</sub> -O <sub>19</sub> | -0.68        | -6.98      |
| C <sub>27</sub> -H <sub>29</sub> | 1.097        | 0.970      | H <sub>22</sub> -C <sub>21</sub> -C <sub>24</sub> | 110.27       | 108.48     | H <sub>18</sub> -O <sub>17</sub> -C <sub>30</sub> -C <sub>27</sub> | 179.43       | 173.44     |
| C <sub>27</sub> -C <sub>30</sub> | 1.518        | 1.494      | H <sub>23</sub> -C <sub>21</sub> -C <sub>24</sub> | 112.79       | 108.42     | O <sub>15</sub> -C <sub>20</sub> -C <sub>21</sub> -H <sub>22</sub> | 80.34        | -52.02     |
|                                  |              |            | C <sub>21</sub> -C <sub>24</sub> -H <sub>25</sub> | 108.02       | 109.17     | O <sub>15</sub> -C <sub>20</sub> -C <sub>21</sub> -H <sub>23</sub> | -32.58       | 64.40      |
|                                  |              |            | C <sub>21</sub> -C <sub>24</sub> -H <sub>26</sub> | 110.11       | 109.25     | O <sub>15</sub> -C <sub>20</sub> -C <sub>21</sub> -C <sub>24</sub> | -158.43      | -173.73    |

|                                                   |        |        |                                                                    |         |         |
|---------------------------------------------------|--------|--------|--------------------------------------------------------------------|---------|---------|
| C <sub>21</sub> -C <sub>24</sub> -C <sub>27</sub> | 113.44 | 112.07 | O <sub>16</sub> -C <sub>20</sub> -C <sub>21</sub> -H <sub>22</sub> | -97.96  | -114.31 |
| H <sub>25</sub> -C <sub>24</sub> -H <sub>26</sub> | 105.66 | 107.90 | O <sub>16</sub> -C <sub>20</sub> -C <sub>21</sub> -H <sub>23</sub> | 149.12  | 120.18  |
| H <sub>25</sub> -C <sub>24</sub> -C <sub>27</sub> | 109.46 | 109.19 | O <sub>16</sub> -C <sub>20</sub> -C <sub>21</sub> -C <sub>24</sub> | 23.27   | 7.47    |
| H <sub>26</sub> -C <sub>24</sub> -C <sub>27</sub> | 109.84 | 109.17 | C <sub>20</sub> -C <sub>21</sub> -C <sub>24</sub> -H <sub>25</sub> | -167.79 | -166.49 |
| C <sub>24</sub> -C <sub>27</sub> -H <sub>28</sub> | 112.00 | 108.85 | C <sub>20</sub> -C <sub>21</sub> -C <sub>24</sub> -H <sub>26</sub> | -52.88  | -48.73  |
| C <sub>24</sub> -C <sub>27</sub> -H <sub>29</sub> | 111.52 | 108.83 | C <sub>20</sub> -C <sub>21</sub> -C <sub>24</sub> -C <sub>27</sub> | 70.67   | 72.41   |
| C <sub>24</sub> -C <sub>27</sub> -C <sub>30</sub> | 111.47 | 113.56 | H <sub>22</sub> -C <sub>21</sub> -C <sub>24</sub> -H <sub>25</sub> | -49.21  | -44.70  |
| H <sub>28</sub> -C <sub>27</sub> -H <sub>29</sub> | 106.01 | 107.74 | H <sub>22</sub> -C <sub>21</sub> -C <sub>24</sub> -H <sub>26</sub> | 65.71   | 73.07   |
| H <sub>28</sub> -C <sub>27</sub> -C <sub>30</sub> | 107.63 | 108.83 | H <sub>22</sub> -C <sub>21</sub> -C <sub>24</sub> -C <sub>27</sub> | -170.74 | -165.80 |
| H <sub>29</sub> -C <sub>27</sub> -C <sub>30</sub> | 107.94 | 108.80 | H <sub>23</sub> -C <sub>21</sub> -C <sub>24</sub> -H <sub>25</sub> | 69.19   | 71.76   |
| O <sub>17</sub> -C <sub>30</sub> -O <sub>19</sub> | 123.84 | 122.58 | H <sub>23</sub> -C <sub>21</sub> -C <sub>24</sub> -H <sub>26</sub> | -175.89 | -170.47 |
| O <sub>17</sub> -C <sub>30</sub> -C <sub>27</sub> | 111.29 | 112.78 | H <sub>23</sub> -C <sub>21</sub> -C <sub>24</sub> -C <sub>27</sub> | -52.34  | -49.34  |
| O <sub>19</sub> -C <sub>30</sub> -C <sub>27</sub> | 124.87 | 124.64 | C <sub>21</sub> -C <sub>24</sub> -C <sub>27</sub> -H <sub>28</sub> | -59.81  | -59.09  |
|                                                   |        |        | C <sub>21</sub> -C <sub>24</sub> -C <sub>27</sub> -H <sub>29</sub> | 58.82   | 58.07   |
|                                                   |        |        | C <sub>21</sub> -C <sub>24</sub> -C <sub>27</sub> -C <sub>30</sub> | 179.53  | 179.52  |
|                                                   |        |        | H <sub>25</sub> -C <sub>24</sub> -C <sub>27</sub> -H <sub>28</sub> | 179.47  | 179.82  |
|                                                   |        |        | H <sub>25</sub> -C <sub>24</sub> -C <sub>27</sub> -H <sub>29</sub> | -61.91  | -63.02  |
|                                                   |        |        | H <sub>25</sub> -C <sub>24</sub> -C <sub>27</sub> -C <sub>30</sub> | 58.81   | 58.43   |
|                                                   |        |        | H <sub>26</sub> -C <sub>24</sub> -C <sub>27</sub> -H <sub>28</sub> | 63.89   | 62.08   |
|                                                   |        |        | H <sub>26</sub> -C <sub>24</sub> -C <sub>27</sub> -H <sub>29</sub> | -177.49 | -179.25 |
|                                                   |        |        | H <sub>26</sub> -C <sub>24</sub> -C <sub>27</sub> -C <sub>30</sub> | -56.77  | -59.31  |
|                                                   |        |        | C <sub>24</sub> -C <sub>27</sub> -C <sub>30</sub> -O <sub>17</sub> | -179.19 | 144.64  |
|                                                   |        |        | C <sub>24</sub> -C <sub>27</sub> -C <sub>30</sub> -O <sub>19</sub> | 0.92    | -34.03  |
|                                                   |        |        | H <sub>28</sub> -C <sub>27</sub> -C <sub>30</sub> -O <sub>17</sub> | 57.63   | 23.24   |
|                                                   |        |        | H <sub>28</sub> -C <sub>27</sub> -C <sub>30</sub> -O <sub>19</sub> | -122.26 | -156.33 |
|                                                   |        |        | H <sub>29</sub> -C <sub>27</sub> -C <sub>30</sub> -O <sub>17</sub> | -56.40  | -93.94  |
|                                                   |        |        | H <sub>29</sub> -C <sub>27</sub> -C <sub>30</sub> -O <sub>19</sub> | 123.71  | 86.40   |

---

Table S3. Second order perturbation theory analysis of Fock matrix in NBO basis including the stabilization energies using DFT/B3LYP/6-311++G(d,p) method.

| Donor ( <i>i</i> )                    | ED( <i>i</i> )<br>(e) | Acceptor ( <i>j</i> )                   | ED( <i>j</i> )<br>(e) | E(2) <sup>a</sup><br>(kJ/mol) | E( <i>j</i> )-E( <i>i</i> ) <sup>b</sup><br>(kJ/mol) | F( <i>i</i> , <i>j</i> ) <sup>c</sup><br>(kJ/mol) |
|---------------------------------------|-----------------------|-----------------------------------------|-----------------------|-------------------------------|------------------------------------------------------|---------------------------------------------------|
| $\sigma(\text{N}_4\text{-H}_{13})$    | 0.9934                | $\sigma^*(\text{N}_2\text{-C}_{12})$    | 0.0155                | 13.31                         | 4.73                                                 | 0.32                                              |
| $\sigma(\text{N}_4\text{-H}_{14})$    | 0.9939                | $\sigma^*(\text{C}_{10}\text{-C}_{12})$ | 0.0108                | 10.26                         | 4.94                                                 | 0.28                                              |
| $\sigma(\text{C}_5\text{-H}_6)$       | 0.9897                | $\sigma^*(\text{N}_2\text{-C}_{12})$    | 0.0155                | 10.76                         | 4.23                                                 | 0.27                                              |
| $\sigma(\text{C}_{10}\text{-H}_{11})$ | 0.9883                | $\sigma^*(\text{N}_2\text{-C}_{12})$    |                       | 10.72                         | 4.14                                                 | 0.27                                              |
| $n_2\text{Cl}_1$                      | 0.9812                | $\sigma^*(\text{C}_5\text{-C}_7)$       | 0.0129                | 10.13                         | 3.60                                                 | 0.24                                              |
| $n_1\text{C}_7$                       | 0.5457                | $\pi^*(\text{N}_2\text{-C}_5)$          | 0.3108                | 423.49                        | 0.38                                                 | 0.55                                              |
| $n_1\text{C}_7$                       |                       | $\pi^*(\text{C}_8\text{-C}_{10})$       | 0.1033                | 106.18                        | 0.71                                                 | 0.44                                              |
| $n_1\text{O}_{15}$                    | 0.9784                | $\sigma^*(\text{N}_2\text{-H}_3)$       | 0.0255                | 20.98                         | 4.90                                                 | 0.41                                              |
| $n_1\text{O}_{16}$                    | 0.9829                | $\sigma^*(\text{N}_4\text{-H}_{14})$    | 0.0137                | 13.06                         | 5.11                                                 | 0.33                                              |
| $\sigma(\text{O}_{15}\text{-O}_{16})$ | 0.9473                | $\sigma^*(\text{O}_{15}\text{-C}_{20})$ | 0.0145                | 17.92                         | 3.31                                                 | 0.31                                              |
| $\sigma(\text{O}_{15}\text{-O}_{16})$ |                       | $\sigma^*(\text{O}_{16}\text{-C}_{20})$ | 0.0146                | 18.00                         | 3.31                                                 | 0.31                                              |
| $\sigma(\text{O}_{15}\text{-O}_{16})$ |                       | $\sigma^*(\text{C}_{20}\text{-C}_{21})$ | 0.0313                | 42.62                         | 2.97                                                 | 0.46                                              |
| $\sigma(\text{O}_{15}\text{-C}_{20})$ | 0.9817                | $\sigma^*(\text{O}_{15}\text{-O}_{16})$ | 0.0448                | 25.37                         | 3.52                                                 | 0.38                                              |
| $\sigma(\text{O}_{16}\text{-C}_{20})$ | 0.9792                | $\sigma^*(\text{O}_{15}\text{-O}_{16})$ |                       | 32.91                         | 3.48                                                 | 0.44                                              |
| $\sigma(\text{O}_{17}\text{-H}_{18})$ | 0.9931                | $\sigma^*(\text{C}_{27}\text{-C}_{30})$ | 0.0334                | 10.09                         | 4.65                                                 | 0.28                                              |
| $\sigma(\text{C}_{21}\text{-H}_{23})$ | 0.9819                | $\sigma^*(\text{O}_{16}\text{-C}_{20})$ | 0.0146                | 10.47                         | 4.06                                                 | 0.26                                              |
| $n_1\text{O}_{17}$                    | 0.9877                | $\sigma^*(\text{O}_{19}\text{-C}_{30})$ | 0.0114                | 16.33                         | 5.07                                                 | 0.36                                              |
| $n_2\text{O}_{17}$                    | 0.9071                | $\pi^*(\text{O}_{19}\text{-C}_{30})$    | 0.1079                | 103.92                        | 1.42                                                 | 0.49                                              |
| $n_2\text{O}_{19}$                    | 0.9194                | $\sigma^*(\text{O}_{17}\text{-C}_{30})$ | 0.0491                | 69.88                         | 2.60                                                 | 0.54                                              |
| $n_2\text{O}_{19}$                    |                       | $\sigma^*(\text{C}_{27}\text{-C}_{30})$ | 0.0334                | 43.42                         | 2.64                                                 | 0.44                                              |

**Table S4**

Theoretical first hyperpolarizability values of 2A5C4C.

| Dipole (Debye) |              | Polarizability (a.u) |             | Hyperpolarizability (a.u) |             |
|----------------|--------------|----------------------|-------------|---------------------------|-------------|
| $\mu_x$        | 3.38427319   | $\alpha_{xx}$        | 235.190613  | $\beta_{xxx}$             | 1905.92510  |
| $\mu_y$        | -3.85133901  | $\alpha_{yy}$        | -24.5448184 | $\beta_{yyy}$             | -1110.14756 |
| $\mu_z$        | -0.393309184 | $\alpha_{zz}$        | 147.814191  | $\beta_{zzz}$             | 673.793837  |
|                |              | $\alpha_{xy}$        | -21.5663200 | $\beta_{xyy}$             | -516.394448 |
|                |              | $\alpha_{xz}$        | -8.48561424 | $\beta_{xxy}$             | 16.9186946  |
|                |              | $\alpha_{yz}$        | 121.929851  | $\beta_{xxz}$             | -53.1985168 |
|                |              |                      |             | $\beta_{xzz}$             | 26.9124082  |
|                |              |                      |             | $\beta_{yzz}$             | 35.4530743  |
|                |              |                      |             | $\beta_{yyz}$             | -55.6048558 |
|                |              |                      |             | $\beta_{xyz}$             | 23.3409203  |

## Thermodynamical properties

On the basis of vibrational analysis at B3LYP/ 6-311++G (d,p) basis set the values of several thermodynamic parameters such as zero point vibrational energy (ZPVE), thermal energy, specific heat capacity ( $C_v$ ), rotational constants, entropy (S) of 2A5C4C is calculated and are presented in Table S5. The obtained value of ZPVE of 2A5C4C is 142.50220 kcal/mol at B3LYP/ 6-311++G (d,p). Dipole moment reflects the molecular charge distribution and is given as a vector in three dimensions. Therefore, it can be used as a descriptor to depict the charge movement across the molecule. The direction of the dipole moment vector in a molecule depends on the centers of positive and negative charges. Dipole moments are strictly determined for neutral molecules. For charged systems, its value depends on the choice of origin and molecular orientation. As a result of B3LYP/ 6-311++G (d,p) basis set calculations the dipole moment of 13.0698 was observed.

**Table S5** Thermodynamical properties of 2A5C4C.

| Basis Set                    | B3LYP/<br>6-311++G(d,p) |
|------------------------------|-------------------------|
| Zero point energy (Kcal/Mol) | 142.50220               |
| Rotational constant          | 0.86930                 |
| Rotational temperature       | 0.04172                 |
| Energy (E)                   |                         |
| Translational                | 0.889                   |
| Rotational                   | 0.889                   |
| Vibrational                  | 147.625                 |
| Total                        | 149.402                 |
| Specific heat ( $C_v$ )      |                         |
| Translational                | 2.981                   |
| Rotational                   | 2.981                   |
| Vibrational                  | 40.359                  |
| Total                        | 46.320                  |
| Entropy(S)                   |                         |
| Translational                | 42.567                  |
| Rotational                   | 34.287                  |
| Vibrational                  | 28.540                  |
| Total                        | 105.394                 |
| Dipole moment                | 13.0698                 |



## Mulliken population analysis and natural population analysis

The calculation of atomic charges plays an important role in the application of quantum chemical calculation to a molecular system because of atomic charges effect dipole moment, molecular polarizability, electronic structure and more a lot of properties of molecular systems. The Mulliken and Natural Population analyses are very common and effective population analysis methods and the total atomic charge values are obtained by Mulliken population analysis, and natural charges are obtained by NBO (natural bond analysis), although, both methods predict the same tendencies. In the present study B3LYP/6-311++G (d,p) method was employed to study both the atomic charge population of 2A5C4C. In both the NPA and Mulliken analysis the charges of the N2 and N4 nitrogen atoms (-0.25976&-0.39174 (NPA) and -0.58473 & -0.64878 (Mulliken)) and O15, O16, O17 and O19 oxygen atoms (-0.47217, -0.48174, -0.35148, -0.29587 (NPA) and -0.37721, -0.35075, -0.47992, -0.44602 (Mulliken)) exhibits substantial negative values and act as a electron donors. All the hydrogen atoms exhibit a net positive charge. The presence of large negative charge on O atom and net positive charge on H atom may suggest the formation of intramolecular interaction in solid forms.<sup>1</sup>

Minor dissimilarities in the natural and Mulliken atomic charges are noted (Fig. S4 and Table S6). The variation error between the natural and Mulliken atomic charges has been expressed by root mean square deviation (RMSD) using the following equation<sup>2</sup>

$$RMSD = \sqrt{\frac{1}{n-1} \sum_i^n (\gamma_i^{Natural} - \gamma_i^{Mulliken})^2} \quad (1)$$

Where n is the number of natural or Mulliken data. The RMSD value is found to be 0.00001% error for natural and Mulliken atomic charges.

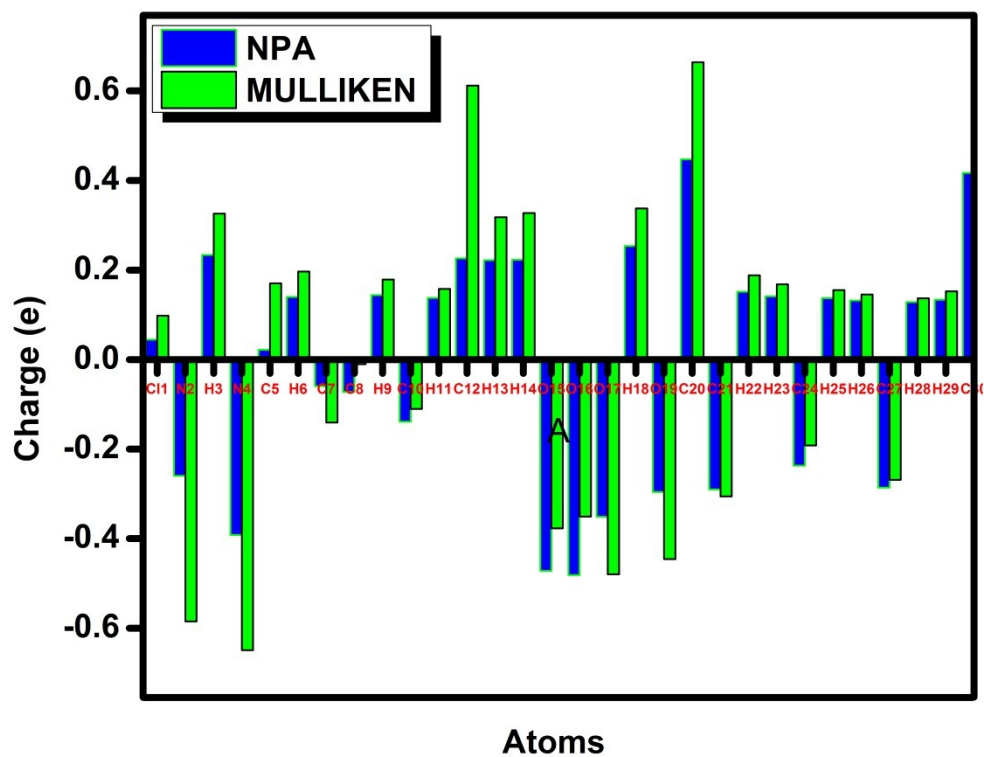

Fig. S4. Atomic charge population of 2A5C4C..

Table S6 Atomic charge population of 2A5C4C.

| Atoms | Natural population | Mulliken population |
|-------|--------------------|---------------------|
| C11   | 0.04447            | 0.097923            |
| N2    | -0.25976           | -0.58473            |
| H3    | 0.23367            | 0.326296            |
| N4    | -0.39174           | -0.64878            |
| C5    | 0.022              | 0.170512            |
| H6    | 0.13983            | 0.196798            |
| C7    | -0.05926           | -0.14074            |
| C8    | -0.0725            | -0.01035            |
| H9    | 0.14406            | 0.178909            |
| C10   | -0.13883           | -0.11013            |
| H11   | 0.13802            | 0.157856            |

|     |          |          |
|-----|----------|----------|
| C12 | 0.22628  | 0.611799 |
| H13 | 0.2223   | 0.318144 |
| H14 | 0.22293  | 0.327321 |
| O15 | -0.47217 | -0.37721 |
| O16 | -0.48174 | -0.35075 |
| O17 | -0.35148 | -0.47992 |
| H18 | 0.25397  | 0.337649 |
| O19 | -0.29587 | -0.44602 |
| C20 | 0.44753  | 0.663785 |
| C21 | -0.29021 | -0.30563 |
| H22 | 0.15176  | 0.188238 |
| H23 | 0.14152  | 0.168087 |
| C24 | -0.23711 | -0.19185 |
| H25 | 0.13727  | 0.155062 |
| H26 | 0.13181  | 0.145538 |
| C27 | -0.28604 | -0.26864 |
| H28 | 0.12858  | 0.136911 |

## References

1. Rubarani P. Gangadharan, and S. Sampath Krishnan, *Acta Physica Polonica A* 2015, **127**, 748-752.
2. R. Agilandeswari, A. Aditya Prasad, S. Sivaraman, S. Kalainathan and SP. Meenakshisundaram, *Mol. Cryst. Liq. Cryst.*, 2016, **625**, 238-252.
